# Supplementary material for: Bread breakdown pathways during mastication: impact of wheat bran fortification
Source: Royal Society of Chemistry journal article supplement (doi:10.1039/d1fo02057a), 2021-01-01
Supplement: d1fo02057a1.pdf [file d1fo02057a1.pdf]

**Table S1** Pearson's correlation of bolus properties at the swallowing stage

|                                     | 1        | 2        | 3        | 4        | 5       | 6         | 7       | 8       | 9        | 10      | 11      | 12      | 13      | 14      | 15     | 16      | 17     | 18      | 19 |
|-------------------------------------|----------|----------|----------|----------|---------|-----------|---------|---------|----------|---------|---------|---------|---------|---------|--------|---------|--------|---------|----|
| 1 MC <sub>bolus</sub>               | 1        |          |          |          |         |           |         |         |          |         |         |         |         |         |        |         |        |         |    |
| 2 MC <sub>bolus-DM</sub>            | 0.992**  | 1        |          |          |         |           |         |         |          |         |         |         |         |         |        |         |        |         |    |
| 3 residue                           | 0.662**  | 0.664**  | 1        |          |         |           |         |         |          |         |         |         |         |         |        |         |        |         |    |
| 4 h <sub>s</sub>                    | 0.945**  | 0.969**  | 0.622**  | 1        |         |           |         |         |          |         |         |         |         |         |        |         |        |         |    |
| 5 h <sub>w</sub>                    | 0.885**  | 0.920**  | 0.571**  | 0.987**  | 1       |           |         |         |          |         |         |         |         |         |        |         |        |         |    |
| 6 M <sub>saliva_in_spit</sub>       | 0.852**  | 0.886**  | 0.432*   | 0.964**  | 0.985*  | 1         |         |         |          |         |         |         |         |         |        |         |        |         |    |
| 7 SAAbread                          | 0.352*   | 0.348*   | 0.298    | 0.374*   | 0.378*  | 0.345*    | 1       |         |          |         |         |         |         |         |        |         |        |         |    |
| 8 SAAbolus                          | 0.358*   | 0.349*   | 0.297    | 0.359*   | 0.353*  | 0.319     | 0.995** | 1       |          |         |         |         |         |         |        |         |        |         |    |
| 9 large particles fraction          | -0.516** | -0.513** | -0.229   | -0.403*  | -0.319  | -0.305    | -0.068  | -0.101  | 1        |         |         |         |         |         |        |         |        |         |    |
| 10 small particles fraction         | 0.516**  | 0.513**  | 0.229    | 0.403*   | 0.319   | 0.305     | 0.068   | 0.101   | -1**     | 1       |         |         |         |         |        |         |        |         |    |
| 11 D <sub>75</sub>                  | -0.1636  | -0.169   | -0.096   | -0.102   | -0.054  | -0.037    | -0.165  | -0.192  | 0.554*   | -0.554* | 1       |         |         |         |        |         |        |         |    |
| 12 D <sub>50</sub>                  | -0.112   | -0.115   | -0.075   | -0.052   | -0.007  | 0.008     | -0.133  | -0.158  | 0.475*   | -0.475* | 0.974*  | 1       |         |         |        |         |        |         |    |
| 13 D <sub>75</sub> /D <sub>25</sub> | -0.145   | -0.148   | -0.028   | -0.088   | -0.043  | -0.039    | -0.114  | -0.147  | 0.6003*  | -0.600* | 0.887*  | 0.799*  | 1       |         |        |         |        |         |    |
| 14 Median Area                      | -0.216   | -0.219   | -0.127   | -0.160   | -0.115  | -0.094    | -0.255  | -0.281  | 0.5359*  | -0.535* | 0.952*  | 0.929*  | 0.867*  | 1       |        |         |        |         |    |
| 15 Particle number per DM bolus     | 0.364*   | 0.345*   | 0.116    | 0.280    | 0.223   | 0.221     | 0.352*  | 0.357*  | -0.732*  | 0.732*  | -0.582* | -0.533* | -0.645* | -0.693* | 1      |         |        |         |    |
| 16 hardness                         | -0.670** | -0.632** | -0.426** | -0.512** | -0.569* | -0.4913** | -0.399* | -0.404* | 0.380*   | -0.380* | 0.014   | -0.009  | 0.031   | 0.289   | -0.324 | 1       |        |         |    |
| 17 adhesiveness                     | 0.405*   | 0.414*   | 0.385*   | 0.426*   | 0.434*  | 0.397*    | 0.178   | 0.166   | -0.234   | 0.235   | -0.071  | -0.047  | 0.077   | -0.127  | 0.153  | -0.213  | 1      |         |    |
| 18 cohesiveness                     | 0.588**  | 0.600**  | 0.314    | 0.612*   | 0.621*  | 0.605**   | 0.425** | 0.420** | -0.460** | 0.460** | 0.045   | 0.002   | -0.094  | -0.208  | 0.425* | -0.625* | 0.046  | 1       |    |
| 19 chewiness                        | -0.674** | -0.637** | -0.473*  | -0.493*  | -0.557* | -0.462*   | -0.339* | -0.343* | 0.267    | -0.267  | 0.069   | 0.041   | 0.039   | 0.293   | -0.297 | 0.968*  | -0.258 | -0.470* | 1  |

Notes: \* Correlation is significant at the level of 0.05 (2-tailed); \*\* Correlation is significant at the level of 0.01 (2-tailed).

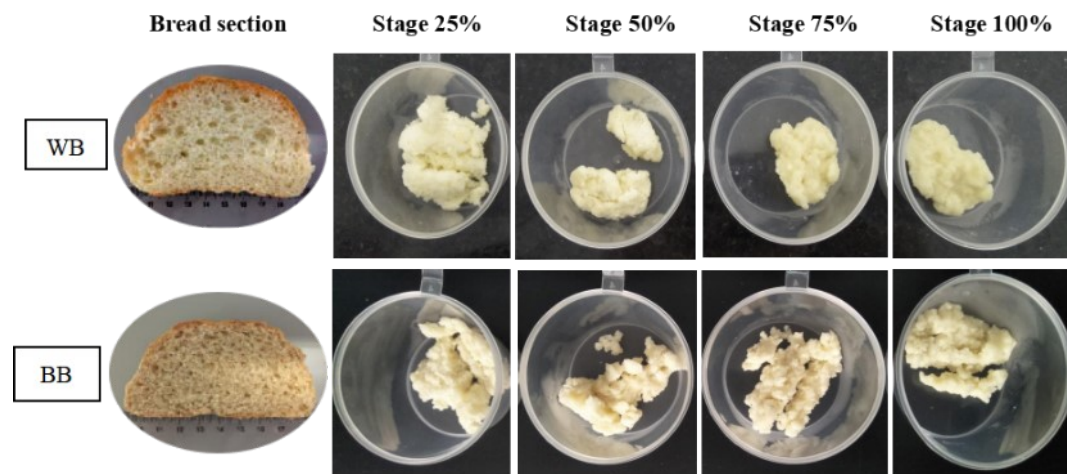

**Fig. S1** Representative images of bread section and bread boluses (panellist #18) for WB and BB at different mastication stages (25%, 50%, 75% and 100%). WB: white wheat bread; BB: bran-fortified wheat bread. Boluses were spat into containers of 50-mm diameter and 4-mm height.

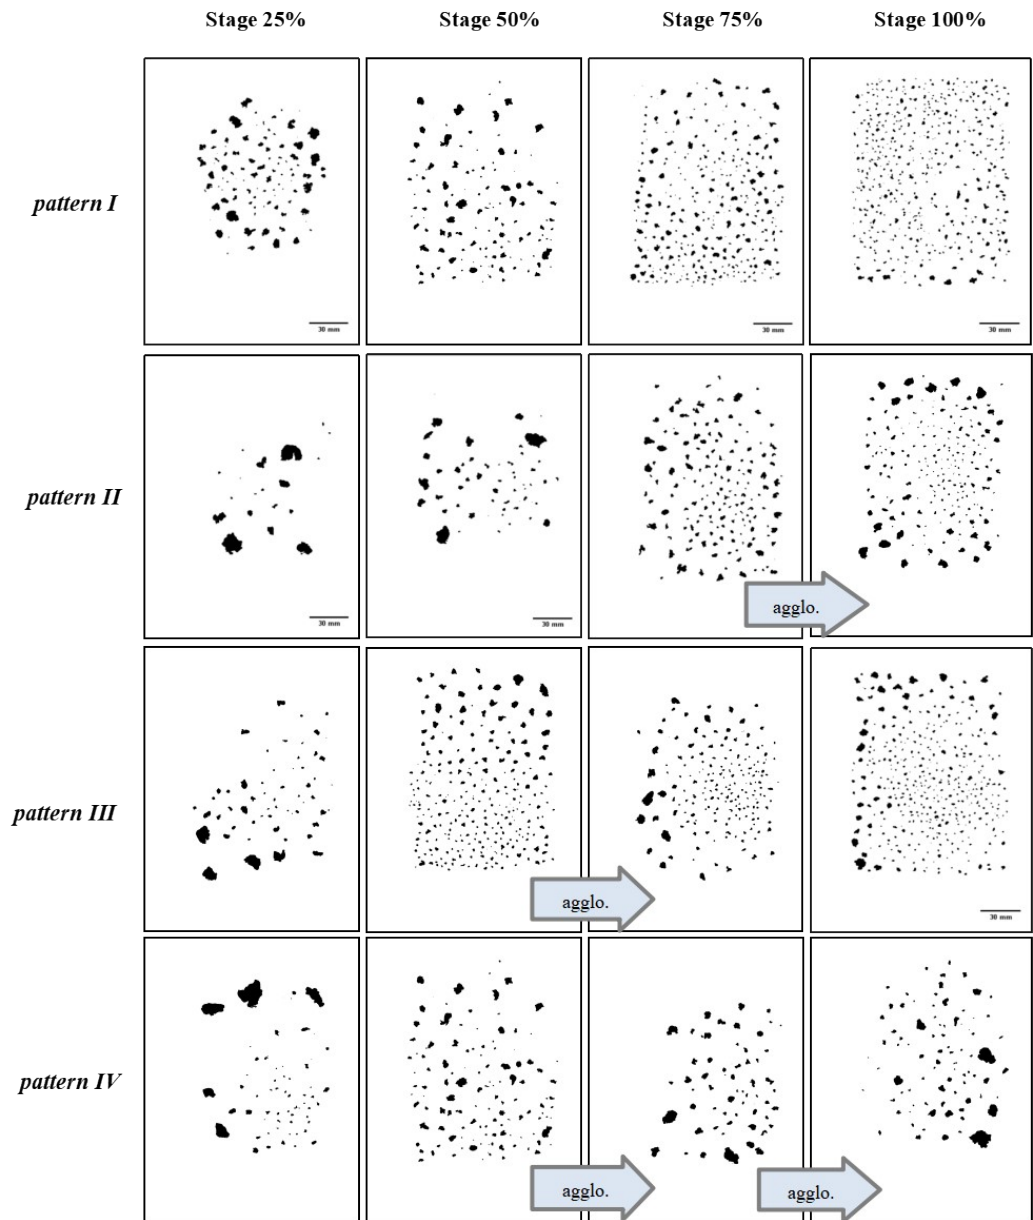

**Fig. S2** Representative images of bolus-particle disintegration pattern I, II, III and IV. The scale bar in the images is 30 mm. The arrow indicates the occurrence of agglomeration (agglo.).
